# Supplementary material for: Effects of Temperature and Salinity on Perfluorooctane Sulfonate (PFOS) Toxicity in Larval Estuarine Organisms
Source: MDPI journal article supplement (doi:10.3390/toxics12040267), 2024-04-02
Supplement: s1 [file s1]

**Title:** Effects of temperature and salinity on Perfluorooctane Sulfonate (PFOS) toxicity in larval estuarine organisms

**Authors and Affiliations:**

Katy W. Chung<sup>1\*</sup>, Peter B. Key<sup>1</sup>, Philip Tanabe<sup>1</sup>, Marie E. DeLorenzo<sup>1</sup>

<sup>1</sup>National Oceanic and Atmospheric Administration (NOAA), National Ocean Service, National Centers for Coastal Ocean Science, Charleston, SC, USA

\*Corresponding author:

Katy W. Chung  
NOAA, NOS, National Centers for Coastal Ocean Science  
331 Fort Johnson Rd.  
Charleston, SC 29412  
katy.chung@noaa.gov  
843-580-9820

Table S1. Water quality measurements from temperature, ad salinity PFOS testing with the four larval species. Mean values are presented with the range in parentheses.

| Parameter               | Shrimp ( <i>P. pugio</i> ) | Fish ( <i>C. variegatus</i> ) | Mysid ( <i>A. bahia</i> ) | Snail ( <i>T. obsoleta</i> ) | Exposure       |
|-------------------------|----------------------------|-------------------------------|---------------------------|------------------------------|----------------|
| Temperature (°C)        | 25.50 (24.90 – 26.10)      | 24.20 (23.80 – 24.70)         | 25.06 (24.30 – 25.80)     | 24.16 (23.00 – 25.70)        | 25°C<br>20-ppt |
|                         | 25.58 (25.20 – 25.90)      | 24.15 (23.70 – 24.90)         | 24.72 (23.60 – 25.60)     | 24.10 (23.00 – 26.20)        | 25°C<br>10-ppt |
|                         | 33.06 (32.90 – 33.20)      | 32.18 (30.00 – 33.10)         | 33.10 (33.10 – 33.10)     | 32.96 (32.70 – 33.20)        | 32°C<br>20-ppt |
|                         | 33.06 (32.90 – 33.20)      | 32.18 (30.00 – 33.10)         | 33.10 (33.10 – 33.10)     | 32.96 (32.70 – 33.20)        | 32°C<br>10-ppt |
| Dissolved Oxygen (mg/L) | 6.78 (6.22 – 7.70)         | 6.95 (6.79 – 7.11)            | 6.49 (5.92 – 6.68)        | 6.82 (6.52 – 7.16)           | 25°C<br>20-ppt |
|                         | 7.19 (6.65 – 8.13)         | 7.36 (7.10 – 7.55)            | 6.67 (6.07 – 7.24)        | 7.15 (6.83 – 7.58)           | 25°C<br>10-ppt |
|                         | 6.35 (5.64 – 7.58)         | 6.09 (5.92 – 6.31)            | 5.48 (4.81 – 5.72)        | 6.31 (5.86 – 6.68)           | 32°C<br>20-ppt |
|                         | 6.71 (6.01 – 8.14)         | 6.34 (6.19 – 6.53)            | 5.85 (5.36 – 6.08)        | 6.43 (6.19 – 6.65)           | 32°C<br>10-ppt |
| Salinity (ppt)          | 20.48 (20.20 – 20.73)      | 20.18 (19.90 – 20.38)         | 20.28 (20.25 – 20.32)     | 20.56 (19.96 – 21.50)        | 25°C<br>20-ppt |
|                         | 10.40 (10.30 – 10.55)      | 10.39 (10.26 – 10.50)         | 10.33 (10.00 – 10.78)     | 10.05 (10.00 – 10.20)        | 25°C<br>10-ppt |
|                         | 20.02 (19.74 – 20.25)      | 20.37 (20.19 – 20.60)         | 20.37 (20.22 – 20.56)     | 20.40 (20.00 – 21.60)        | 32°C<br>20-ppt |
|                         | 10.20 (10.11 – 10.37)      | 10.37 (10.23 – 10.49)         | 9.36 (9.01 – 10.20)       | 10.25 (10.00 – 11.00)        | 32°C<br>10-ppt |
| pH                      | 7.84 (7.79 – 7.88)         | 7.88 (7.80 – 7.95)            | 7.86 (7.82 – 7.90)        | 8.01 (7.90 – 8.28)           | 25°C<br>20-ppt |
|                         | 7.84 (7.79 – 7.88)         | 7.99 (7.97 – 8.05)            | 7.67 (7.46 – 8.00)        | 7.81 (7.75 – 7.92)           | 25°C<br>10-ppt |
|                         | 7.87 (7.59 – 7.98)         | 7.90 (7.81 – 8.01)            | 7.80 (7.70 – 7.87)        | 8.00 (7.95 – 8.05)           | 32°C<br>20-ppt |
|                         | 7.70 (7.64 – 7.75)         | 7.90 (7.87 – 7.95)            | 7.49 (7.42 – 7.56)        | 7.85 (7.81 – 7.93)           | 32°C<br>10-ppt |

**Table S2:** Mean measured (mg/L) concentrations from the PFOS exposures (T=0h and T=24h) and % survival for larval grass shrimp (*Palaemon pugio*).

| Temperature (°C) | Salinity (ppt) | Nominal (mg/L) | Measured T=0h | Measured T=24h | % Survival |
|------------------|----------------|----------------|---------------|----------------|------------|
| 25               | 20             | 0.00           | 0.00          | 0.00           | 100        |
|                  |                | 0.63           | 0.36          | 0.38           | 96.67      |
|                  |                | 1.85           | 0.81          | 1.09           | 86.67      |
|                  |                | 5.56           | 2.18          | 2.02           | 43.33      |
|                  |                | 16.67          | 5.3           | 4.16           | 3.33       |
|                  |                | 50.0           | 32.2          | 21.88          | 0.00       |
| 25               | 10             | 0.00           | 0.00          | 0.00           | 90.00      |
|                  |                | 0.63           | 0.53          | 0.57           | 76.67      |
|                  |                | 1.85           | 1.11          | 1.35           | 66.67      |
|                  |                | 5.56           | 3.25          | 3.67           | 3.33       |
|                  |                | 16.67          | 7.73          | 5.53           | 0.00       |
|                  |                | 50             | 22.91         | 27.39          | 0.00       |
| 32               | 20             | 0.00           | 0.00          | 0.00           | 100        |
|                  |                | 0.63           | 0.5           | 0.47           | 100        |
|                  |                | 1.85           | 0.88          | 1.34           | 96.67      |
|                  |                | 5.56           | 2.08          | 2.81           | 20.00      |
|                  |                | 16.67          | 5.37          | 7.73           | 0.00       |
|                  |                | 50             | 21.84         | 35             | 0.00       |
| 32               | 10             | 0.00           | 0.00          | 0.00           | 96.67      |
|                  |                | 0.63           | 0.94          | 0.65           | 46.67      |
|                  |                | 1.85           | 1.35          | 1.38           | 36.67      |
|                  |                | 5.56           | 3.42          | 3.68           | 6.67       |
|                  |                | 16.67          | 7.57          | 7.96           | 0          |
|                  |                | 50             | 26.84         | 39.52          | 0          |

**Table S3:** Mean measured (mg/L) concentrations from the PFOS exposures (T=0h and T=24h) and % survival for larval sheepshead minnow (*Cyprinodon variegatus*).

| Temperature (°C) | Salinity (ppt) | Nominal (mg/L) | Measured T=0h | Measured T=24h | % Survival |
|------------------|----------------|----------------|---------------|----------------|------------|
| 25               | 20             | 0.00           | 0.00          | 0.00           | 100        |
|                  |                | 0.1            | 0.21          | 0.17           | 76.67      |
|                  |                | 0.31           | 0.3           | 0.27           | 76.67      |
|                  |                | 0.93           | 0.7           | 0.54           | 63.33      |
|                  |                | 2.78           | 1.73          | 1.48           | 30.00      |
|                  |                | 8.33           | 6.16          | 4.1            | 3.33       |
| 25               | 10             | 0.00           | 0.00          | 0.00           | 100        |
|                  |                | 0.1            | 0.18          | 0.18           | 90.00      |
|                  |                | 0.31           | 0.28          | 0.29           | 93.33      |
|                  |                | 0.93           | 0.55          | 0.61           | 83.33      |
|                  |                | 2.78           | 1.49          | 1.6            | 56.67      |
|                  |                | 8.33           | 4.32          | 5.23           | 0.00       |
| 32               | 20             | 0.00           | 0.00          | 0.00           | 100        |
|                  |                | 0.1            | 0.18          | 0.19           | 80.00      |
|                  |                | 0.31           | 0.28          | 0.26           | 76.67      |
|                  |                | 0.93           | 0.57          | 0.5            | 6.67       |
|                  |                | 2.78           | 1.39          | 1.46           | 0.00       |
|                  |                | 8.33           | 4.91          | 4.55           | 0.00       |
| 32               | 10             | 0.00           | 0.00          | 0.00           | 100        |
|                  |                | 0.1            | 0.18          | 0.18           | 86.67      |
|                  |                | 0.31           | 0.28          | 0.29           | 93.33      |
|                  |                | 0.93           | 0.57          | 0.58           | 40.00      |
|                  |                | 2.78           | 1.61          | 1.54           | 0.000      |
|                  |                | 8.33           | 6.32          | 1.14           | 0.00       |

**Table S4:** Mean measured (mg/L) concentrations from the PFOS exposures (T=0h and T=24h) and % survival for larval mysid (*Americamysis bahia*).

| Temperature (°C) | Salinity (ppt) | Nominal (mg/L) | Measured T=0h | Measured T=24h | % Survival |
|------------------|----------------|----------------|---------------|----------------|------------|
| 25               | 20             | 0.00           | 0.00          | 0.00           | 100        |
|                  |                | 0.21           | 0.24          | 0.24           | 73.33      |
|                  |                | 0.62           | 0.8           | 0.73           | 83.33      |
|                  |                | 1.85           | 2.06          | 1.98           | 46.67      |
|                  |                | 5.56           | 3.68          | 3.56           | 3.33       |
|                  |                | 16.67          | 8.6           | 5.15           | 6.67       |
| 25               | 10             | 0.00           | 0.00          | 0.00           | 100        |
|                  |                | 0.21           | 0.26          | 0.31           | 83.33      |
|                  |                | 0.62           | 0.93          | 1.31           | 66.67      |
|                  |                | 1.85           | 1.98          | 2.39           | 26.67      |
|                  |                | 5.56           | 5.24          | 6.36           | 3.33       |
|                  |                | 16.67          | 17.29         | 8.06           | 0.00       |
| 32               | 20             | 0.00           | 0.00          | 0.00           | 100        |
|                  |                | 0.21           | 0.19          | 0.19           | 86.67      |
|                  |                | 0.62           | 0.91          | 0.88           | 63.33      |
|                  |                | 1.85           | 1.61          | 1.76           | 33.33      |
|                  |                | 5.56           | 5.51          | 3.71           | 0.00       |
|                  |                | 16.67          | 7.57          | 8.34           | 0.00       |
| 32               | 10             | 0.00           | 0.00          | 0.00           | 100        |
|                  |                | 0.21           | 0.24          | 0.28           | 66.67      |
|                  |                | 0.62           | 0.98          | 0.9            | 50.00      |
|                  |                | 1.85           | 1.78          | 2.27           | 33.33      |
|                  |                | 5.56           | 6.22          | 7.13           | 3.33       |
|                  |                | 16.67          | 11.98         | 11.47          | 0.00       |

**Table S5:** Mean measured (mg/L) concentrations from the PFOS exposures (T=0h and T=24h) and % survival for larval mud snail (*Tritia obsoleta*).

| Temperature (°C) | Salinity (ppt) | Nominal (mg/L) | Measured T=0h | Measured T=24h | % Survival |
|------------------|----------------|----------------|---------------|----------------|------------|
| 25               | 20             | 0.00           | 0.00          | 0.00           | 100        |
|                  |                | 0.63           | 0.88          | 1.02           | 66.67      |
|                  |                | 1.25           | 1.71          | 2.24           | 51.67      |
|                  |                | 2.5            | 2.23          | 3.05           | 36.67      |
|                  |                | 5              | 2.67          | 3.78           | 18.33      |
|                  |                | 10             | 5.17          | 3.74           | 0.00       |
| 25               | 10             | 0.00           | 0.00          | 0.00           | 91.67      |
|                  |                | 0.63           | 0.62          | 0.7            | 21.67      |
|                  |                | 1.25           | 1.92          | 2.62           | 15.00      |
|                  |                | 2.5            | 2.55          | 3.32           | 5.00       |
|                  |                | 5              | 5.72          | 4.99           | 1.67       |
|                  |                | 10             | 10.04         | 6.01           | 0.00       |
| 32               | 20             | 0.00           | 0.00          | 0.00           | 95.0       |
|                  |                | 0.63           | 1.21          | 1.23           | 50.00      |
|                  |                | 1.25           | 1.62          | 1.82           | 35.00      |
|                  |                | 2.5            | 2.6           | 2.94           | 28.33      |
|                  |                | 5              | 2.35          | 3.55           | 23.33      |
|                  |                | 10             | 3.53          | 5.02           | 0.000      |
| 32               | 10             | 0.00           | 0.00          | 0.00           | 95.0       |
|                  |                | 0.63           | 0.6           | 0.72           | 16.67      |
|                  |                | 1.25           | 1.92          | 2.44           | 6.67       |
|                  |                | 2.5            | 2.47          | 3.74           | 0.00       |
|                  |                | 5              | 3.68          | 5.21           | 0.00       |
|                  |                | 10             | 8.37          | 6.69           | 0.00       |

Table S6. Results of three-factor ANOVAs with shrimp (A), fish (B), mysids(C), and snails (D). Interaction effects are the results of PFOS concentration (nominal values), temperature, and salinity on mortality along with any significant interaction between the three factors. Only significant results are listed (p value < 0.05). Concentration effects resulted from post-hoc comparisons looking at effects of PFOS interactions with temperature and salinity on mortality as compared to controls. A p-value <0.05 indicates significant differences in mortality occurred with temperature and/or salinity at that concentration. Only significant results are listed.

| A. Shrimp ( <i>P. pugio</i> ) |                |
|-------------------------------|----------------|
| <i>Interaction Effects</i>    | <i>p value</i> |
| PFOS                          | <0.0001        |
| Temperature                   | 0.0181         |
| Salinity                      | <0.0001        |
| PFOS*Salinity                 | <0.0001        |
| <i>Concentration Effects</i>  | <i>p value</i> |
| PFOS*Salinity 0.62 mg/L       | <0.0001        |
| PFOS*Salinity 1.85 mg/L       | <0.0001        |
| PFOS*Salinity 5.56mg/L        | <0.0001        |

| B. Fish ( <i>C. variegatus</i> ) |                |
|----------------------------------|----------------|
| <i>Interaction Effects</i>       | <i>p value</i> |
| PFOS                             | <0.0001        |
| Temperature                      | <0.0001        |
| Salinity                         | 0.0001         |
| PFOS*Temperature                 | <0.0001        |
| PFOS*Salinity                    | 0.0273         |
| <i>Concentration Effects</i>     | <i>p value</i> |
| PFOS*Temperature 0.93 mg/L       | <0.0001        |
| PFOS*Temperature 2.78 mg/L       | <0.0001        |
| PFOS*Salinity 0.31 mg/L          | 0.0119         |
| PFOS*Salinity 0.93 mg/L          | 0.0001         |
| PFOS*Salinity 2.78 mg/L          | 0.0420         |

| C. Mysid ( <i>A. bahia</i> ) |                |
|------------------------------|----------------|
| <i>Interaction Effects</i>   | <i>p value</i> |
| PFOS                         | <0.0001        |

| D. Snail ( <i>T. obsoleta</i> ) |                |
|---------------------------------|----------------|
| <i>Interaction Effects</i>      | <i>p value</i> |
| PFOS                            | <0.0001        |
| Temperature                     | 0.0001         |
| Salinity                        | <0.0001        |
| PFOS*Temperature                | 0.0021         |
| PFOS*Salinity                   | <0.0001        |
| <i>Concentration Effects</i>    | <i>p value</i> |
| PFOS*Temperature 0.62 mg/L      | 0.0004         |
| PFOS*Temperature 1.25 mg/L      | <0.0001        |
| PFOS*Temperature 2.50 mg/L      | 0.0239         |
| PFOS*Salinity 0.62 mg/L         | <0.0001        |
| PFOS*Salinity 1.25 mg/L         | <0.0001        |
| PFOS*Salinity 2.50 mg/L         | <0.0001        |
| PFOS*Salinity 5.00 mg/L         | <0.0001        |
